# Supplementary material for: Synaptogenic activity of the axon guidance molecule Robo2 underlies hippocampal circuit function
Source: PubMed Central journal article supplement — Cell Rep. Author manuscript; Available in PMC 2021 Nov 20. (PMC8605498; doi:10.1016/j.celrep.2021.109828), 2021-10-19
Supplement: NIHMS1749758-supplement-1.pdf [file NIHMS1749758-supplement-1.pdf]

**Supplemental information**

**Synaptogenic activity of the axon guidance**

**molecule Robo2 underlies**

**hippocampal circuit function**

**Heike Blockus, Sebi V. Rolotti, Miklos Szoboszlay, Eugénie Peze-Heidsieck, Tiffany Ming, Anna Schroeder, Nuno Apostolo, Kristel M. Vennekens, Phinikoula S. Katsamba, Fabiana Bahna, Seetha Mannepalli, Goran Ahlsen, Barry Honig, Lawrence Shapiro, Joris de Wit, Attila Losonczy, and Franck Polleux**

1 Supplemental Information

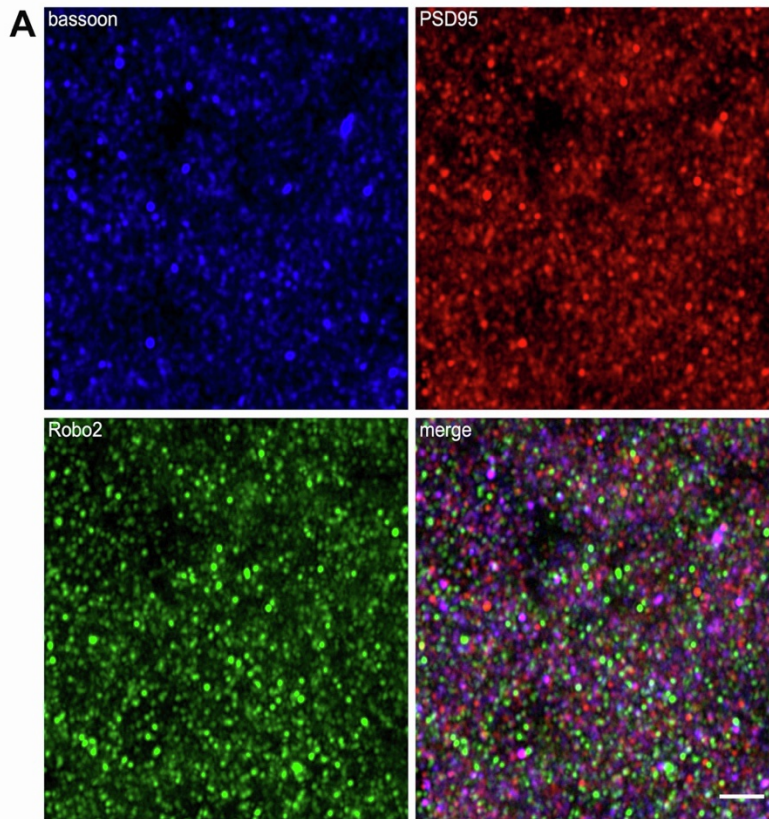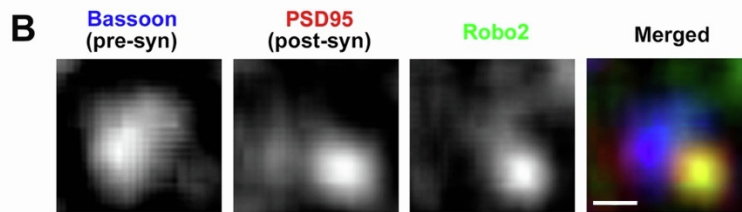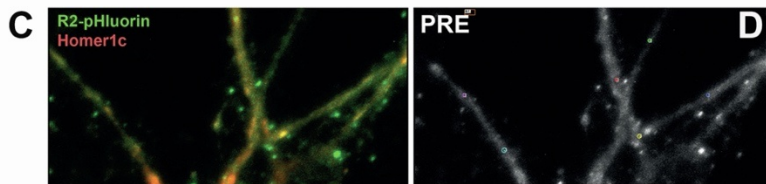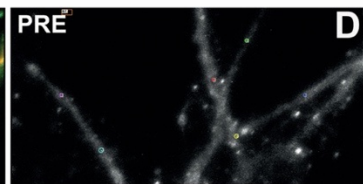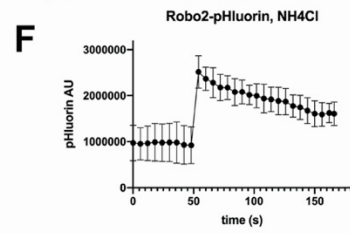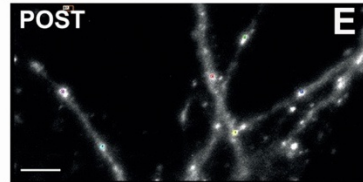

3 **Figure S1. (related to Figure 1)**

4 **(A)** Low magnification confocal images of immunofluorescent staining for Robo2 (green) in CA1 stratum  
5 radiatum at P35, co-stained for the presynaptic marker Bassoon (blue) and the postsynaptic marker PSD-  
6 95 (red) showing punctate staining of Robo2. Scale bar: 10 $\mu$ m

7 **(B)** High magnification of a putative synapse visualized by direct apposition of Bassoon and PSD95  
8 shows strong enrichment of Robo2 with PSD95 suggesting postsynaptic localization. Scale bar: 2 $\mu$ m.

9 **(C-E)** Deacidification of primary dissociated cortical pyramidal neurons in culture (E15+14DIV) co-  
10 electroporated with Robo2-pHluorin and Homer1c-tdtomato with Ammonium Chloride (NH<sub>4</sub>Cl). Scale  
11 bar: 15 $\mu$ m

12 **(F)** Quantification of green fluorescence intensity (pHluorin-Robo2) in dendritic regions of interest (ROI)  
13 shown in panels D-E before (<50sec) and after (>50sec) application of Ammonium Chloride (NH<sub>4</sub>Cl).  
14 Increase in fluorescence after application of NH<sub>4</sub>Cl reflects de-acidification of pHluorin-Robo2 contained  
15 in internal stores. N=3 independent experiments, at least 3 ROIs measured per experiment. Plot shows  
16 Mean with Standard deviation.

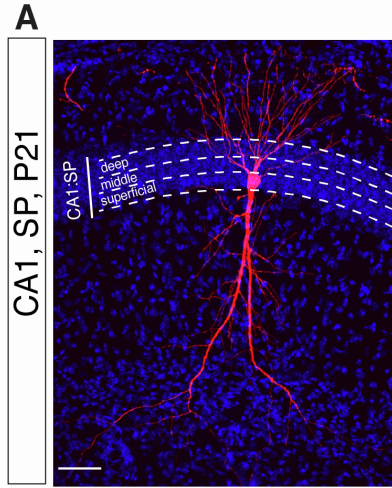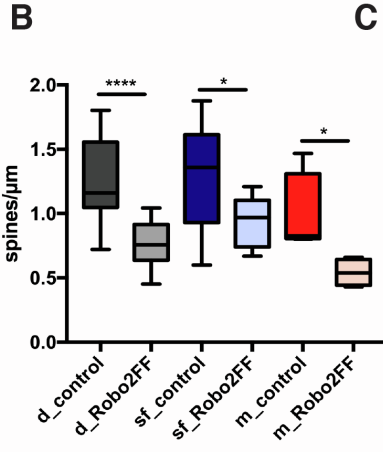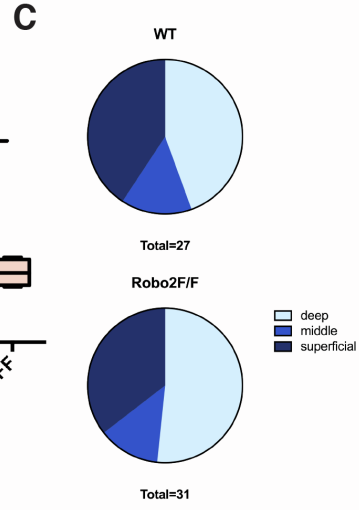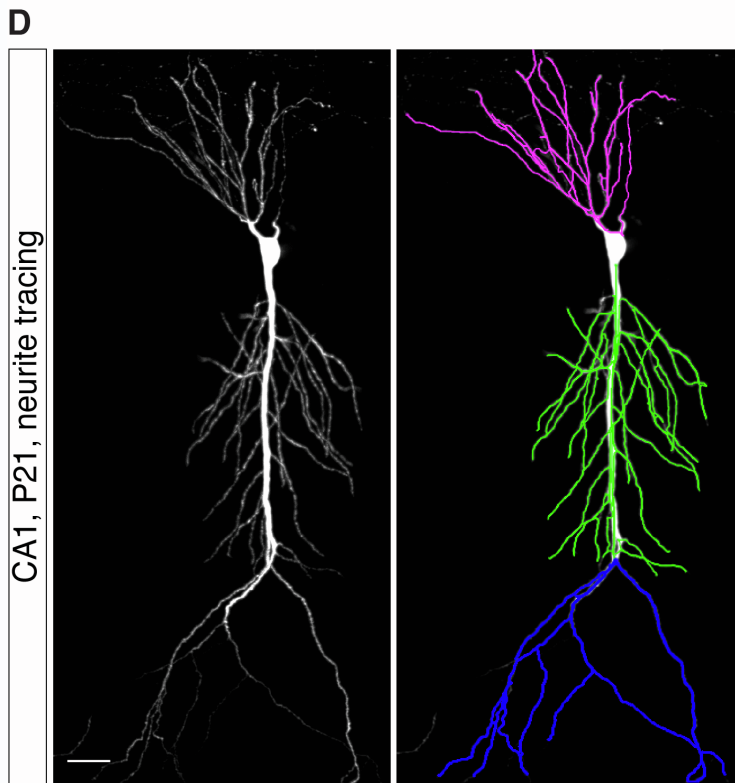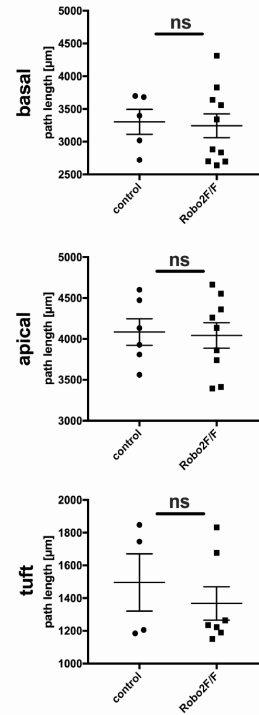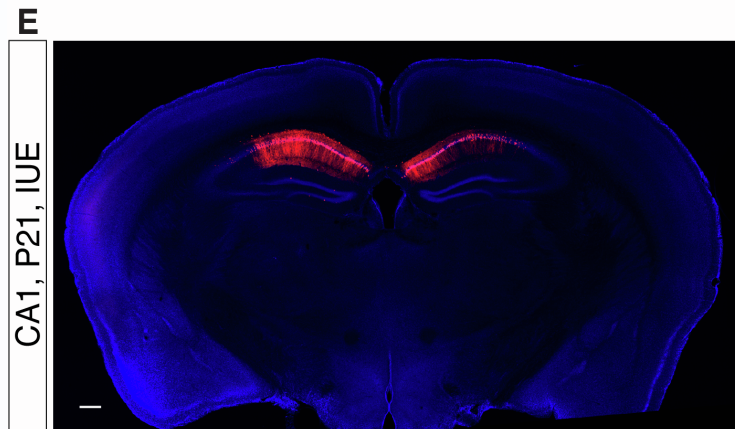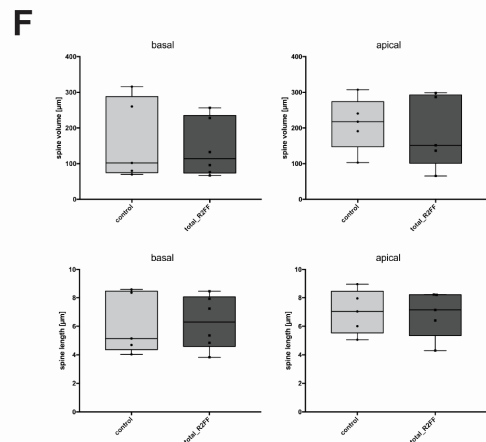

18 **Figure S2 (related to Figure 2).**

19 **(A)** Binning of electroporated CA1 PNs stratum pyramidale (SP) in 3 sublayers: superficial, middle and  
20 deep. Scale bar: 40 $\mu$ m.

21 **(B)** Quantification of spine density in the SR region for control and Robo2-deleted tdTomato+ CA1 PNs  
22 over the three radial bins indicated in panel A. CA1 PNs with cell bodies located in all three SP sub-layers  
23 show statistically significant reduction of spine densities of their dendritic domains in SR. Boxplots:  
24 Median with error bars representing 95% percentile. Statistical analysis: Mann-Whitney, Group sizes (in  
25 segments) and p-values: deep: control; n=12 , Robo2<sup>F/F</sup>:n=16 (p<0.0001); middle: control: n=3 , Robo2<sup>F/F</sup>  
26 :n=3 (p= 0.0286); superficial: control: n=11 , Robo2<sup>F/F</sup> n=11 (p=0.036).

27 **(C)** Pie chart of soma location for CA1 PNs included in quantification shown in panels A-B.

28 **(D)** Robo2 is not required for total dendrite growth of CA1 PNs. Dendritic compartment-based path length  
29 analysis shows similar cumulative dendrite length between WT and Robo2 KO neurons. Neurons were  
30 reconstructed in 3D using the neurite tracer plugin in ImageJ. Scale bar: 25 $\mu$ m. Plots show Mean with  
31 SEM. Statistical analysis: Mann-Whitney, Group sizes (in segments) and p-values: basal: control; n=5 ,  
32 Robo2<sup>F/F</sup>: n=10 (p=0.59); apical: control: n=6 , Robo2<sup>F/F</sup> :n=9 (p= 0.95); tuft: control: n=4 , Robo2<sup>F/F</sup> n=7  
33 (p=0.79)

34 **(E)** Representative low-magnification image of coronal section of electroporated hippocampus at P21  
35 showing that the employed in utero electroporation technique effectively targets CA1, but not neighboring  
36 CA2 or CA3. Scale bar: 100 $\mu$ m.

37 **(F)** Spine volume and spine neck length are not significantly different between WT and Robo2-null CA1  
38 PNs, indicating that no change in spine morphology is apparent in remaining spines of Robo2 KO  
39 compared to control CA1 PNs. The graph shows mean+/-SEM of spines contained in 5 segments for  
40 basal and apical dendrites.



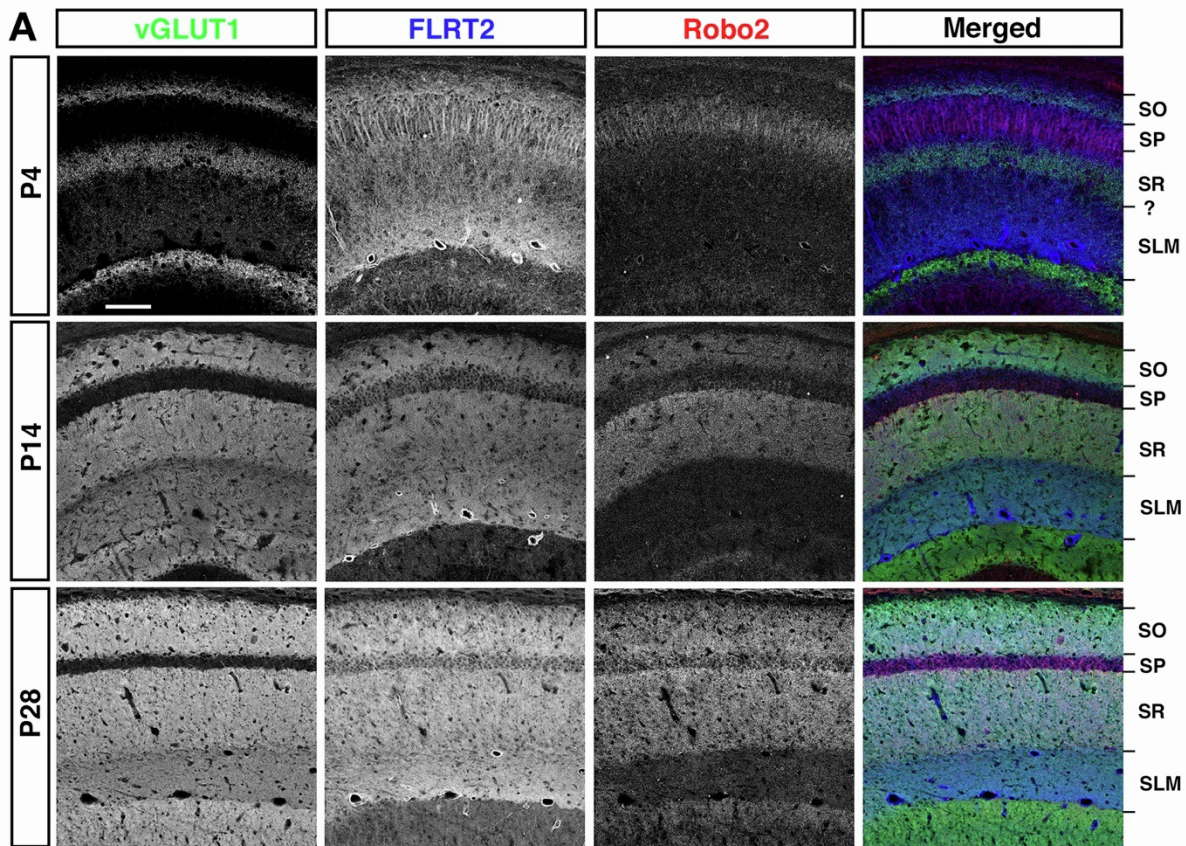

41

42 **Figure S3 (related to Figure 2)**

43 (A) Immunostaining for Robo2, FLRT2 and Vglut1 in hippocampal CA1 at three postnatal time points (P4,  
 44 P14, P28). At P4, Robo2 expression is restricted to the pyramidal layer and proximal dendrites. By P14,  
 45 Robo2 enrichment in SO and SR layers (but exclusion from SLM) observed at P28 is already visible.  
 46 Note that Vglut1 expression, indicating the presence of excitatory presynaptic axons is also restricted to  
 47 thin stripes in SO and very proximal SR suggesting that innervation of CA1 PNs starts in most proximal  
 48 portions of their dendritic arbor. Interestingly, at all three ages, FLRT2 protein localization is observed in  
 49 all sublayers of CA1.

50 Scale bar: 50µm

51

A

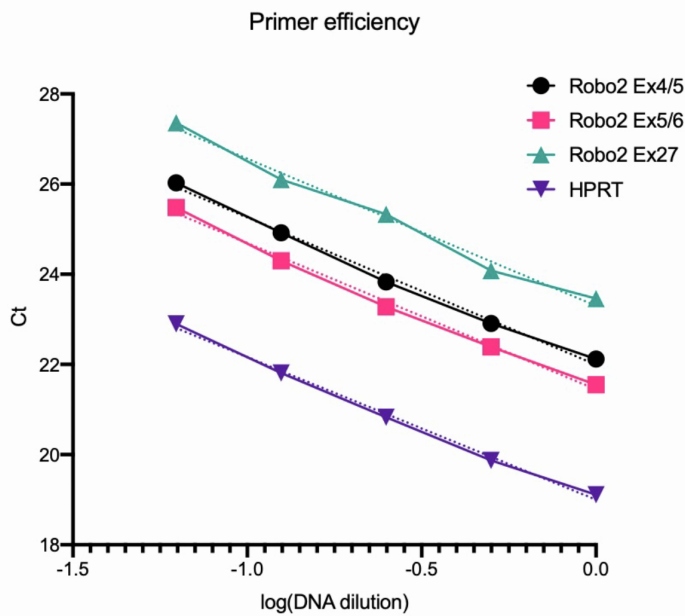

|               | Forward                    | Reverse                    |
|---------------|----------------------------|----------------------------|
| Robo2 Ex4/5   | AGAGCTCACTGTCTTTGAAC<br>G  | GGGATCTCCTTGGACCT<br>GAC   |
| Robo2 Ex5/6   | GCCAACGGTGAGGTGGAA<br>AA   | AACTGTGGAGGAGCAA<br>CAGG   |
| Robo2 Ex27/28 | AGCAGCCAACCTAGAAGA<br>CACA | CACCAGGGACTCCTCTG<br>ATCC  |
| HPRT          | AGCAGGTGTTCTAGTCCT<br>GTGG | ACGCAGCAACTGACAT<br>TTCTAA |

  

|               | Slope | Efficiency (%) | R <sup>2</sup> |
|---------------|-------|----------------|----------------|
| Robo2 Ex4/5   | -3.27 | 102.41         | 0.99           |
| Robo2 Ex5/6   | -3.24 | 103.36         | 1.00           |
| Robo2 Ex27/28 | -3.26 | 102.56         | 0.99           |
| HPRT          | -3.16 | 107.19         | 1.00           |

B

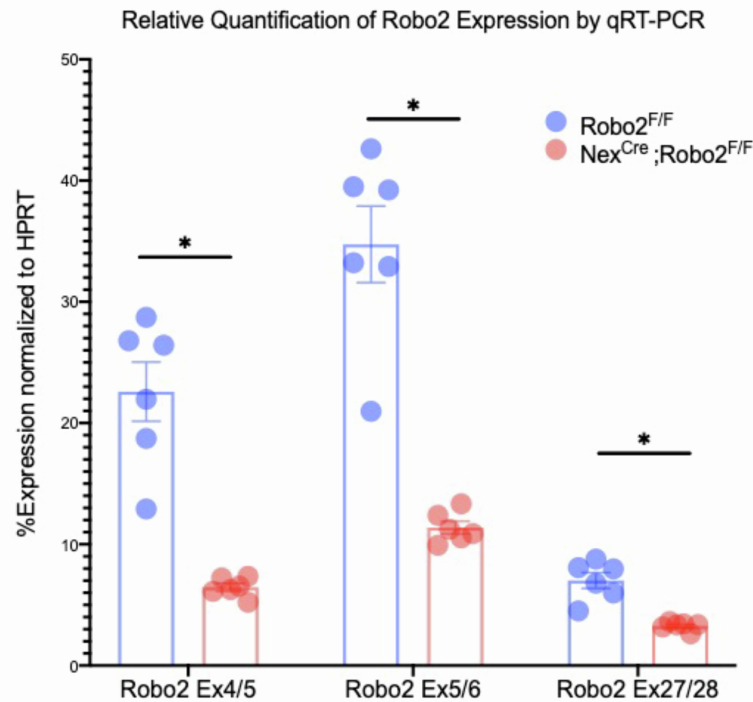

52

53 **Figure S4 (related to Figures 2 and 4).**

54 (A) Linear regression of Cycle threshold (Ct) as a function of log(DNA dilution) of corresponding cDNA  
 55 from the hippocampus showing linear amplification of the designed primers for the quantitative RT-PCR  
 56 (qRT-PCR). Tables provides sequences of the primers as well as the slope, amplification efficiency (%)

57 and R-squared values of each couple of PCR primers. Exons spanned by the corresponding primer sets  
58 were designed using NCBI Primer-BLAST tool.  
59 **(B)** Summary of the qRT-PCR of *Robo2* mRNA expression in dissected hippocampi isolated from adult  
60 *Robo2<sup>F/F</sup>* and *Nex<sup>Cre</sup>;Robo2<sup>F/F</sup>* mice (n= 6 mice per condition, unpaired non-parametric t-test -- Mann-  
61 Whitney -- with a p-value threshold at 0.05). qRT-PCR of HPRT mRNA was used as internal control.



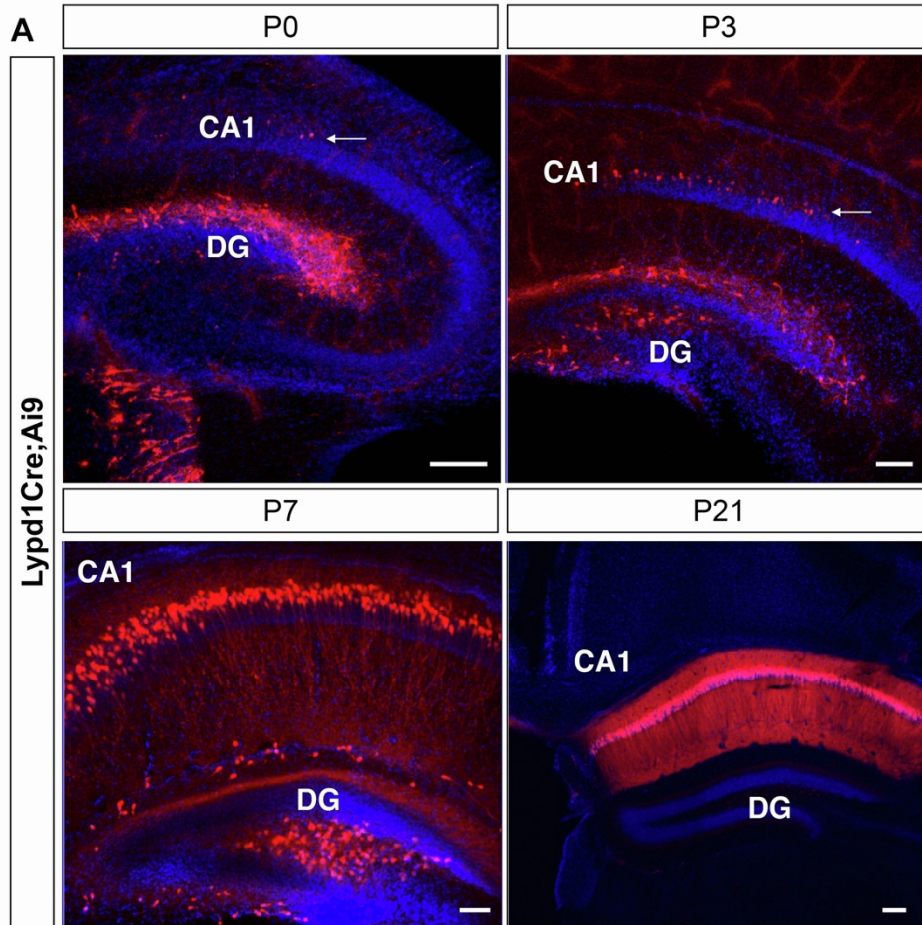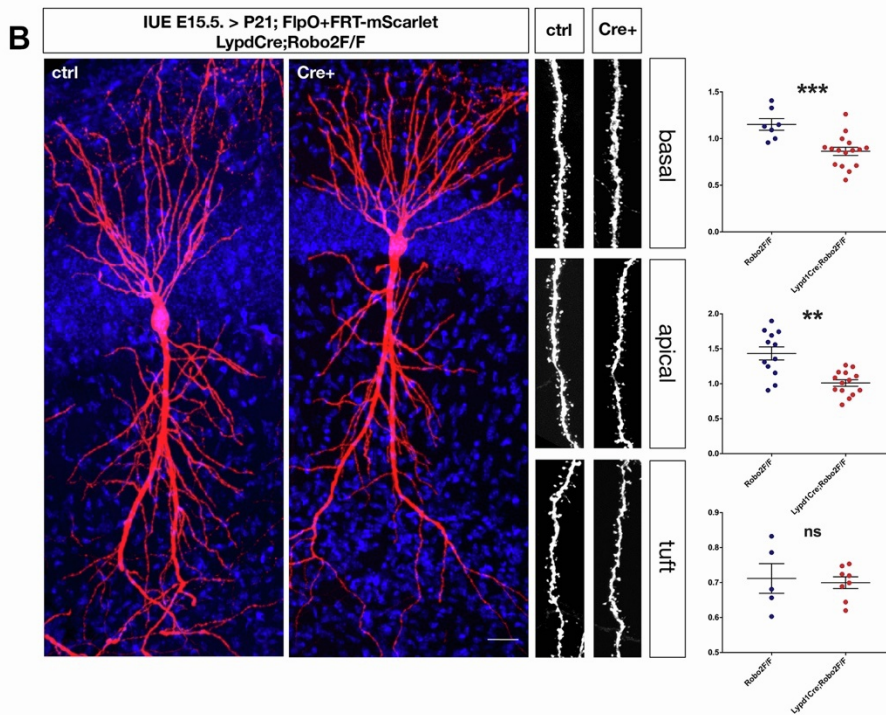

63 **Figure S5 (related to Figure 2)**

64 **(A)** Analysis of onset of Cre-expression in  $Lypd1^{Cre};Ai9$  mice. The Ai9 reporter mouse line expresses  
65 tdTomato upon Cre-dependent recombination of a LoxP-STOP-LoxP cassette. Histological analysis of  
66 Ai9 expression following recombination by the  $Lypd1^{Cre}$  driver line at P0, P3, P7 and P21. Expression is  
67 sparse at P0 and P3 and increases over the first postnatal week to peak at P7 and clearly CA1 PN  
68 specific by P21. Scale bars: 150 $\mu$ m, 75 $\mu$ m, 50 $\mu$ m, 50 $\mu$ m.

69 **(B)** Spine density is decreased in SO and SR dendritic domains of  $Lypd1^{Cre};Robo2^{F/F}$  CA1 PNs compared  
70 to control ( $Robo2^{F/F}$  only). Hippocampal *in utero* co-electroporation of a pCAG:FlpO and a pCAG:Frt-  
71 STOP-Frt::mScarlet1 was performed into  $Lypd1^{Cre};Robo2^{F/F}$  and  $Robo2^{F/F}$  control littermates in order to  
72 achieve FlpO-dependent sparse expression of mScarlet (red) in CA1 PNs of both genotype. Analysis of  
73 spine density shows a decrease in proximal dendritic compartments in  $Robo2$  KO CA1 PNs, akin to the  
74 sparse HIUE approach shown in Figure 2.

75 Scale bar: 40 $\mu$ m. Number of segments analyzed from at least 3 adult mice: basal (SO):  $Robo2^{F/F}$  n=7  
76 (mean=1.152, SD+/-0.16),  $Lypd1^{Cre};Robo2^{F/F}$  n=16 (mean=0.863, SD+/-0.17), p=0.0005; apical oblique  
77 (SR):  $Robo2^{F/F}$  n=12 (mean=1.433, SD+/-0.32),  $Lypd1^{Cre};Robo2^{F/F}$  n=14 (mean=1.011, SD+/-0.17),  
78 p=0.011; apical tuft (SLM):  $Robo2^{F/F}$  n=5 (mean=0.711, SD+/-0.09),  $Lypd1^{Cre};Robo2^{F/F}$  n=8 (mean=  
79 0.697, SD+/-0.047), p>0.99 using a Mann-Whitney non-parametric test.

80

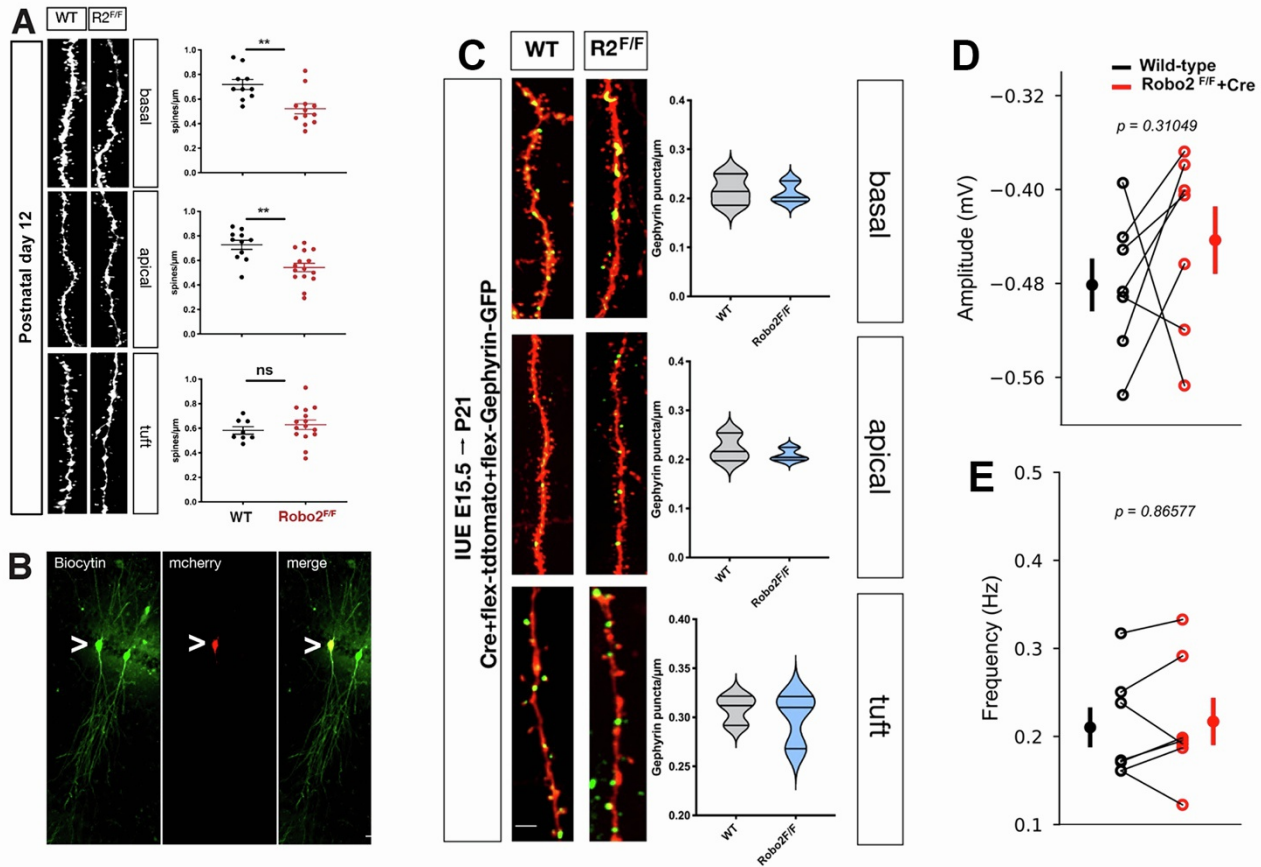

81

82 **Figure S6 (related to Figure 2)**

83 (A) Robo2 is required for synaptic development, rather than maintenance. Spine analysis of P12 wild-  
 84 type or Robo2<sup>F/F</sup> CA1 PNs electroporated with Cre + FLEX::tdTomato shows a similar phenotype seen  
 85 at P21 is already present at the peak of synaptogenesis. Representative images of dendritic branch  
 86 segments. (basal: WT: n=10 dendritic segments, mean=0.72 spines/μm +/-0.037 (SEM), KO: n=12  
 87 dendritic segments, mean=0.52 spines/μm +/-0.034 (SEM), reduction=27.41%, \*\*p<0.01, Mann-Whitney;  
 88 apical: WT: n=11 dendritic segments, mean=0.72 spines/μm +/-0.095 (SEM), KO: n=15 dendritic  
 89 segments, mean=0.54 spines/μm +/-0.041 (SEM), reduction=22.35%, \*\*p<0.01, Mann-Whitney), but not  
 90 distal tuft dendrites (tuft: WT: n=8 dendritic segments, mean=0.58 spines/μm +/-0.031 (SEM), KO: n=15  
 91 dendritic segments, mean=0.63 spines/μm +/-0.037 (SEM), p=0.29, ns, Mann-Whitney). Scale bar:  
 92 10μm.

93 (B) Representative image of hippocampal slice used for electrophysiological recordings of EPSCs and  
 94 IPSCs showing example of two adjacent CA1 PNs filled with biocytin (stained post-hoc with Streptavidin-  
 95 488; green) to unambiguously identify that PNs recorded via patch-clamp were either control CA1 PNs  
 96 (non-electroporated i.e. green only) or CA1 PNs previously *in utero* electroporated with mCherry and Cre  
 97 (red with arrowhead). Scale bar: 20μm.

98 **(C)** Analysis of inhibitory synapse density in CA1 PNs. HIUE was used to induce sparse Cre-dependent  
99 expression of FLEX::EGFP-Gephyrin and FLEX::tdTomato into CA1 PNs during development. Density  
100 of gephyrin+ inhibitory synapses density at P21 is not significantly different between Robo2 KO and WT  
101 CA1 PNs. Scale bar: 15 $\mu$ m. Number of segments: basal: WT n=7 (mean=0.21, SD+/-0.03), Robo2<sup>F/F</sup>  
102 n=16 (mean=0.21, SD+/-0.02), p>0.99; apical: WT n=11 (mean=0.22, SD+/-0.03), Robo2<sup>F/F</sup> n=11  
103 (mean=0.21, SD+/-0.01), p>0.99; tuft: WT n=6 (mean=0.31, SD+/-0.01), Robo2<sup>F/F</sup> n=8 (mean=0.29,  
104 SD+/-0.03), p=0.7. Mann-Whitney test.

105 **(D-E)** Analysis of mIPSPs in acute hippocampal slices. mIPSP analysis between P24-27 shows no  
106 difference in either frequency (WT: mean=0.205 Hz, SEM=0.027 Hz; KO: mean=0.201 Hz, SEM=0.028  
107 Hz) or amplitude (WT: mean=-0.48 mV, SEM=0.023 mV; KO: -0.44 mV, SEM=0.029 mV) of miniature  
108 inhibitory synaptic events in Robo2 KO and WT CA1 PNs (paired recordings as in Figure 2). Data is from  
109 7 pairs of WT and KO cells, p-values are indicated on the figure. Wilcoxon-signed rank test.

110

111

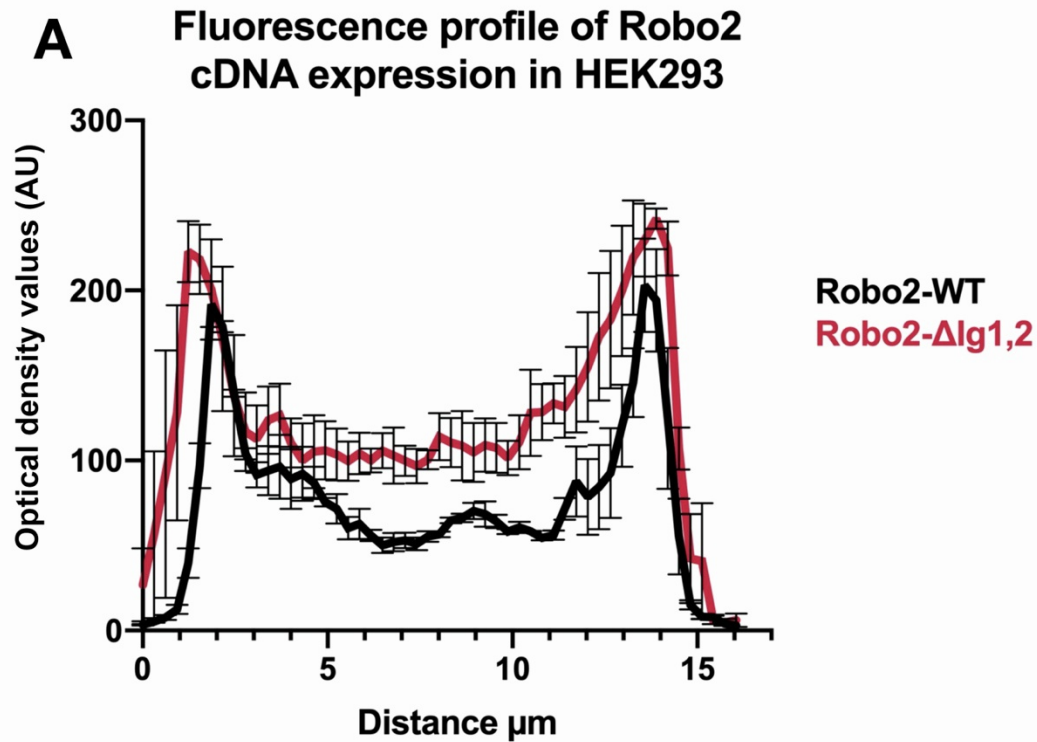

112

113 **Figure S7. (related to Figure 3)**

114 (A) Quantification of EGFP optical density showing membrane targeting of wild-type Robo2-EGFP and  
 115 Robo2- $\Delta\text{Ig1,2}$ -EGFP in HEK293 cells used in the synaptogenic co-culture assay (shown in Fig. 3). Line  
 116 profile of optical density values for 12 different cells were averaged and plotted with cell diameter on the  
 117 x-axis. Values represent mean of 3 biological replicates with >40 cells/replicate with SEM.



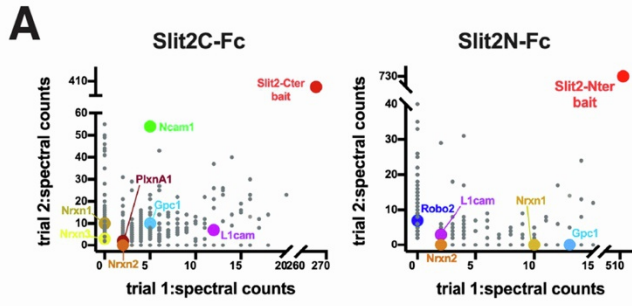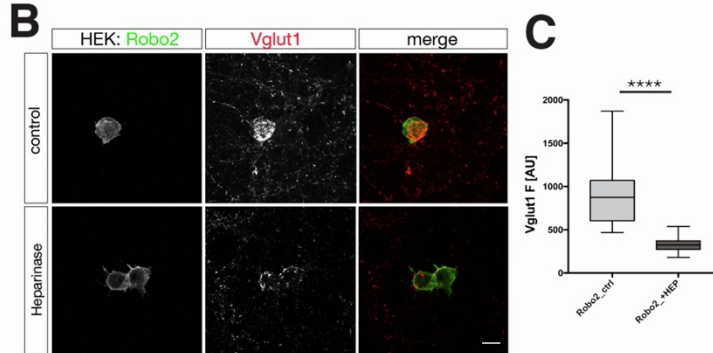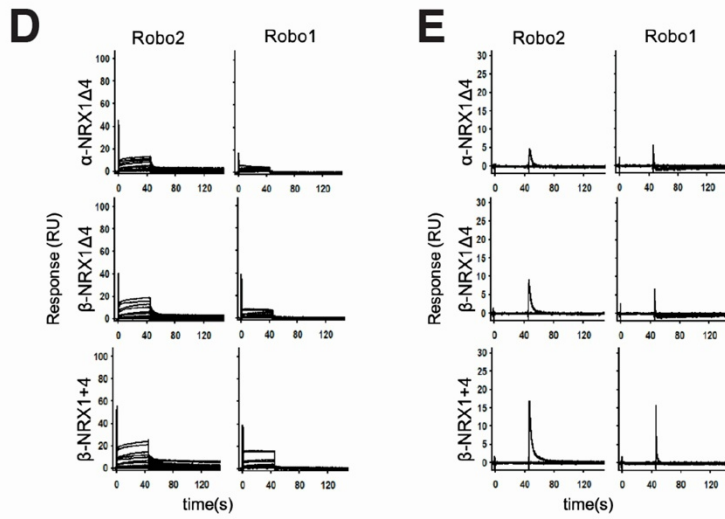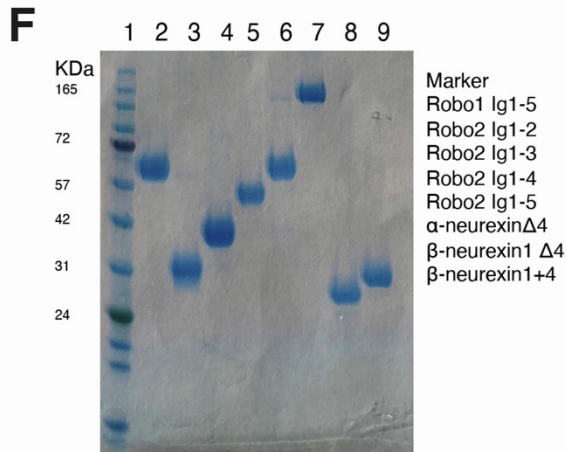

119 **Figure S8. (related to Figure 4)**

120 **(A)** Mass-spectrometry results from synaptosome pulldown using SlitC-Fc and SlitN-Fc. Highlighted are  
121 cell surface adhesion proteins. Plotted data represents Ig-subtracted peptides only.

122 **(B)** Treatment of *in vitro* hemisynapse assay with Heparinase reduces Robo2-dependent Vglut1  
123 clustering. Scale bar: 7 $\mu$ m.

124 **(C)** Quantification of data shown in Panel B. (\*\*\*\* $p < 0.0001$ , Mann-Whitney).

125 **(D, E)** SPR binding experiments of Robos over Neurexins: Binding of Robo2 and Robo1 (Ig1-5) over  
126 surfaces immobilized with  $\alpha$ -NRX1 $\Delta$ 4,  $\beta$ -NRX1 $\Delta$ 4, and  $\beta$ -NRX1+4 ectodomains. (D) Binding of Robos in  
127 the absence of heparin and (E) binding traces of Robos to Nrns in the presence of 3mM EGTA ( $\text{Ca}^{2+}$   
128 chelator), instead of 3mM  $\text{CaCl}_2$ .

129 **(F)** Coomassie blue stained gel showing quality and purity of all proteins used in SPR experiments.

130

131

132
